# Supplementary material for: Effectiveness of current and future regimens for treating genotype 3 hepatitis C virus infection: a large-scale systematic review
Source: PubMed Central journal article supplement (PMC5691805; doi:10.1186/s12879-017-2820-z), 2017-11-16

|                                    | Studies | Patients |  | I-Sq | SVR [95% CI]        |
|------------------------------------|---------|----------|--|------|---------------------|
| <b>DCV+SOF containing regimens</b> |         |          |  |      |                     |
| DCV+SOF                            | 1       | 32       |  | –    | 62.5 [44.9, 78.6]   |
| DCV+SOF+RBV                        | 2       | 42       |  | 0%   | 87.3 [74.1, 96.9]   |
| <b>GZR containing regimens</b>     |         |          |  |      |                     |
| GZR/EBR+SOF                        | 1       | 11       |  | –    | 90.9 [65.0, 100.0]  |
| <b>LDV containing regimens</b>     |         |          |  |      |                     |
| LDV+SOF+RBV                        | 2       | 67       |  | 0%   | 79.1 [68.3, 88.3]   |
| <b>PIB containing regimens</b>     |         |          |  |      |                     |
| PIB+GLE                            | 1       | 24       |  | –    | 100.0 [93.0, 100.0] |
| PIB+GLE+RBV                        | 1       | 24       |  | –    | 100.0 [93.0, 100.0] |
| <b>Peg-IFN containing regimens</b> |         |          |  |      |                     |
| Peg-IFN+RBV                        | 4       | 140      |  | 81%  | 43.6 [35.1, 52.4]   |
| Peg-IFN+SOF+RBV                    | 3       | 78       |  | 0%   | 88.5 [79.5, 95.5]   |
| <b>SOF+RBV</b>                     |         |          |  |      |                     |
| SOF+RBV                            | 11      | 435      |  | 79%  | 60.9 [56.0, 65.6]   |
| <b>VEL Containing regimens</b>     |         |          |  |      |                     |
| VEL100+SOF                         | 3       | 132      |  | 89%  | 84.7 [77.8, 90.6]   |
| VEL100+SOF+RBV                     | 2       | 39       |  | 30%  | 93.3 [82.2, 99.7]   |
| VEL100+SOF+VOX                     | 2       | 55       |  | 0%   | 92.9 [83.9, 98.8]   |

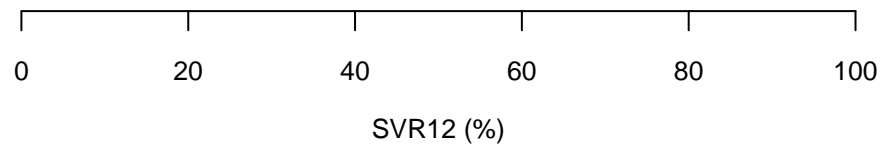

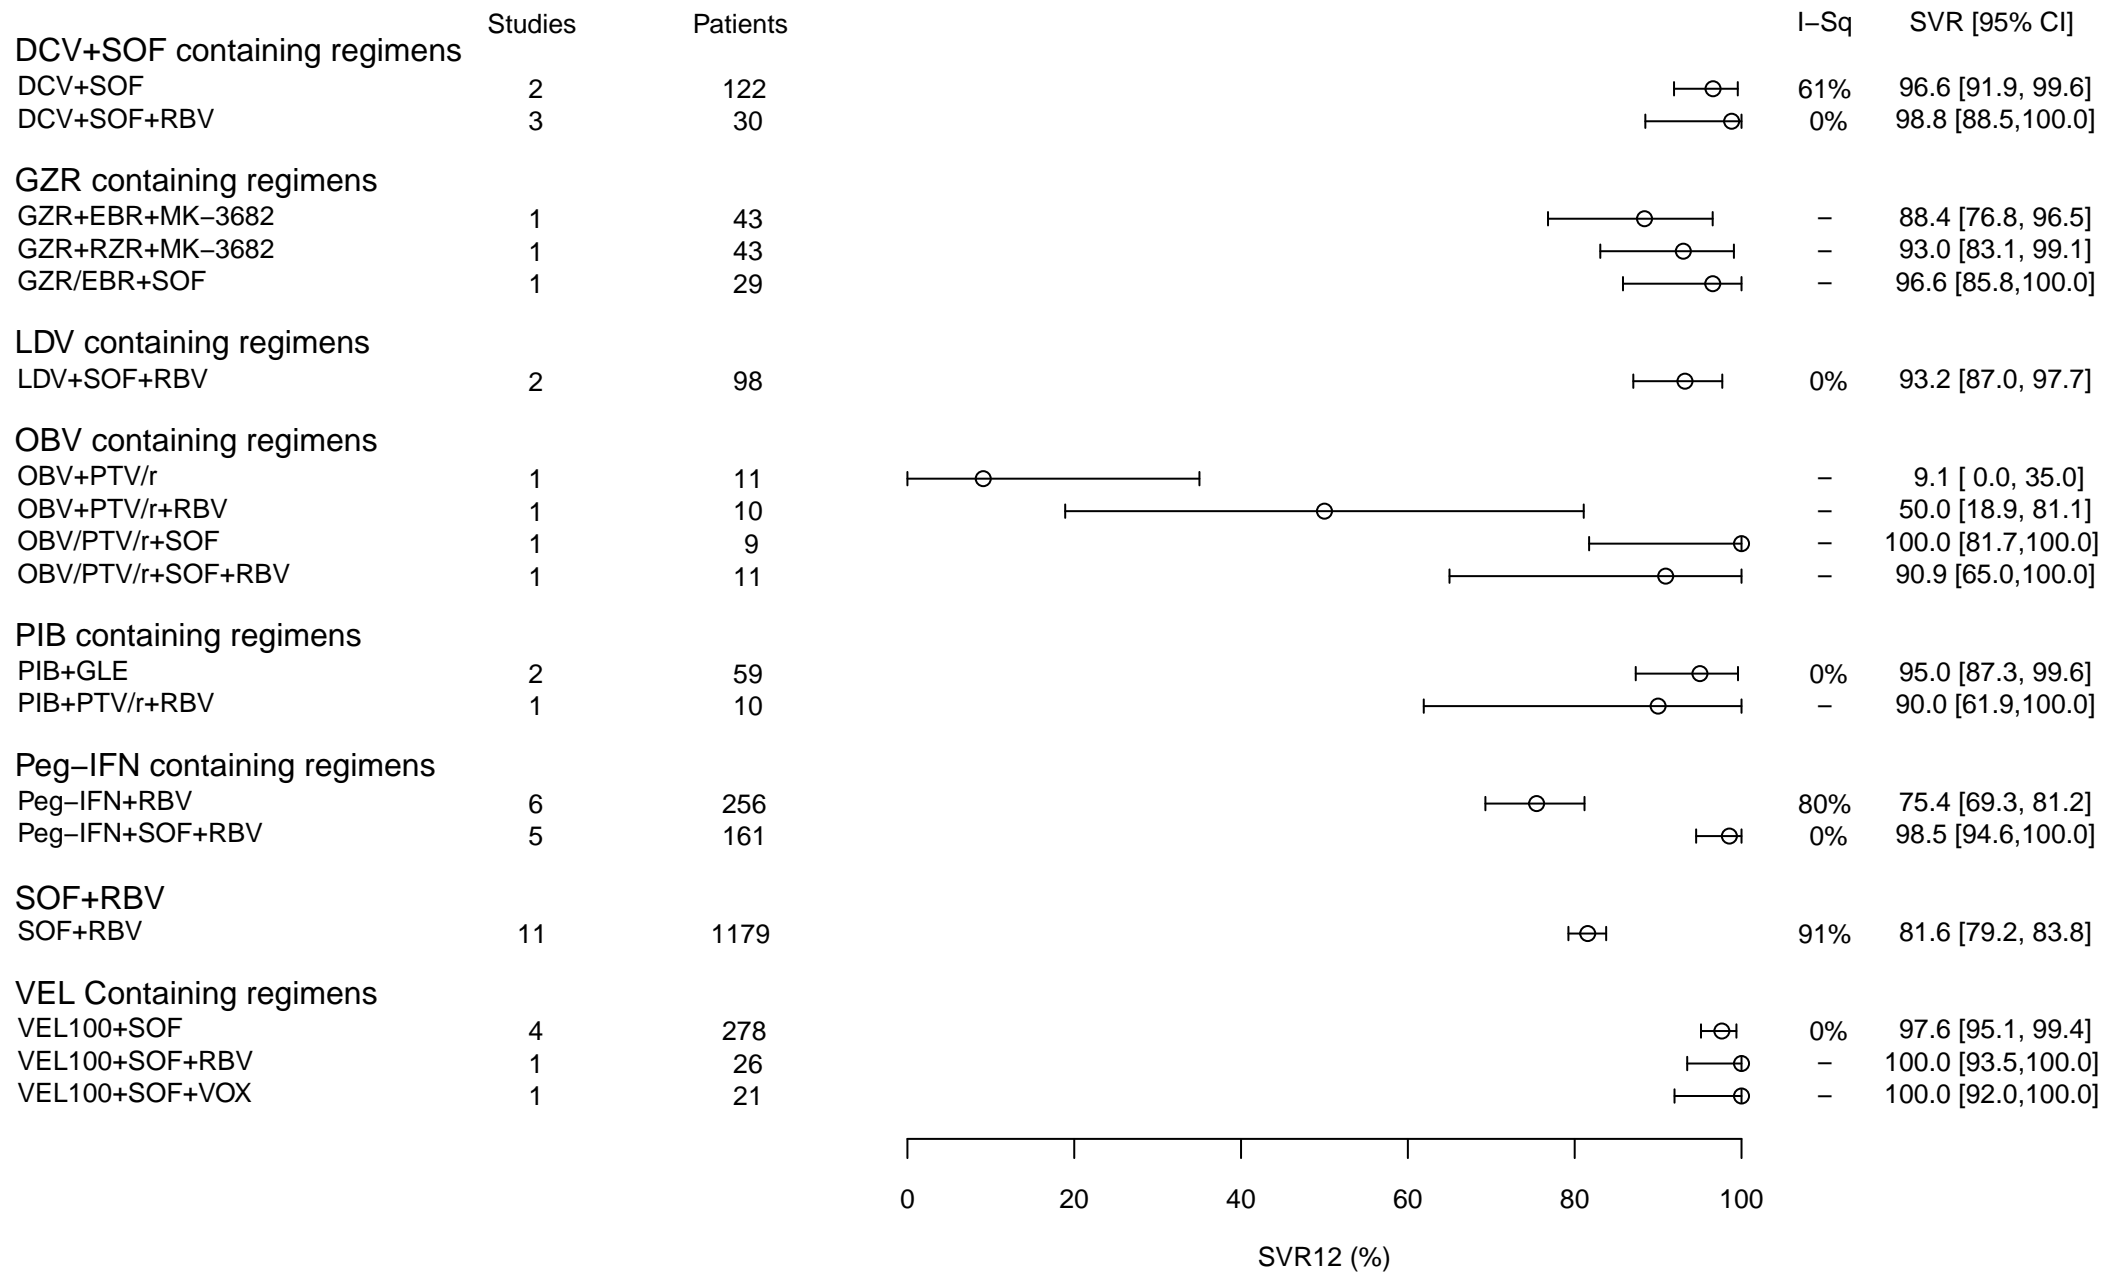

Supplement: 12879_2017_2820_MOESM4_ESM.pdf [file 12879_2017_2820_MOESM4_ESM.pdf]
