# Supplementary material for: Effectiveness of current and future regimens for treating genotype 3 hepatitis C virus infection: a large-scale systematic review
Source: PubMed Central journal article supplement (PMC5691805; doi:10.1186/s12879-017-2820-z), 2017-11-16

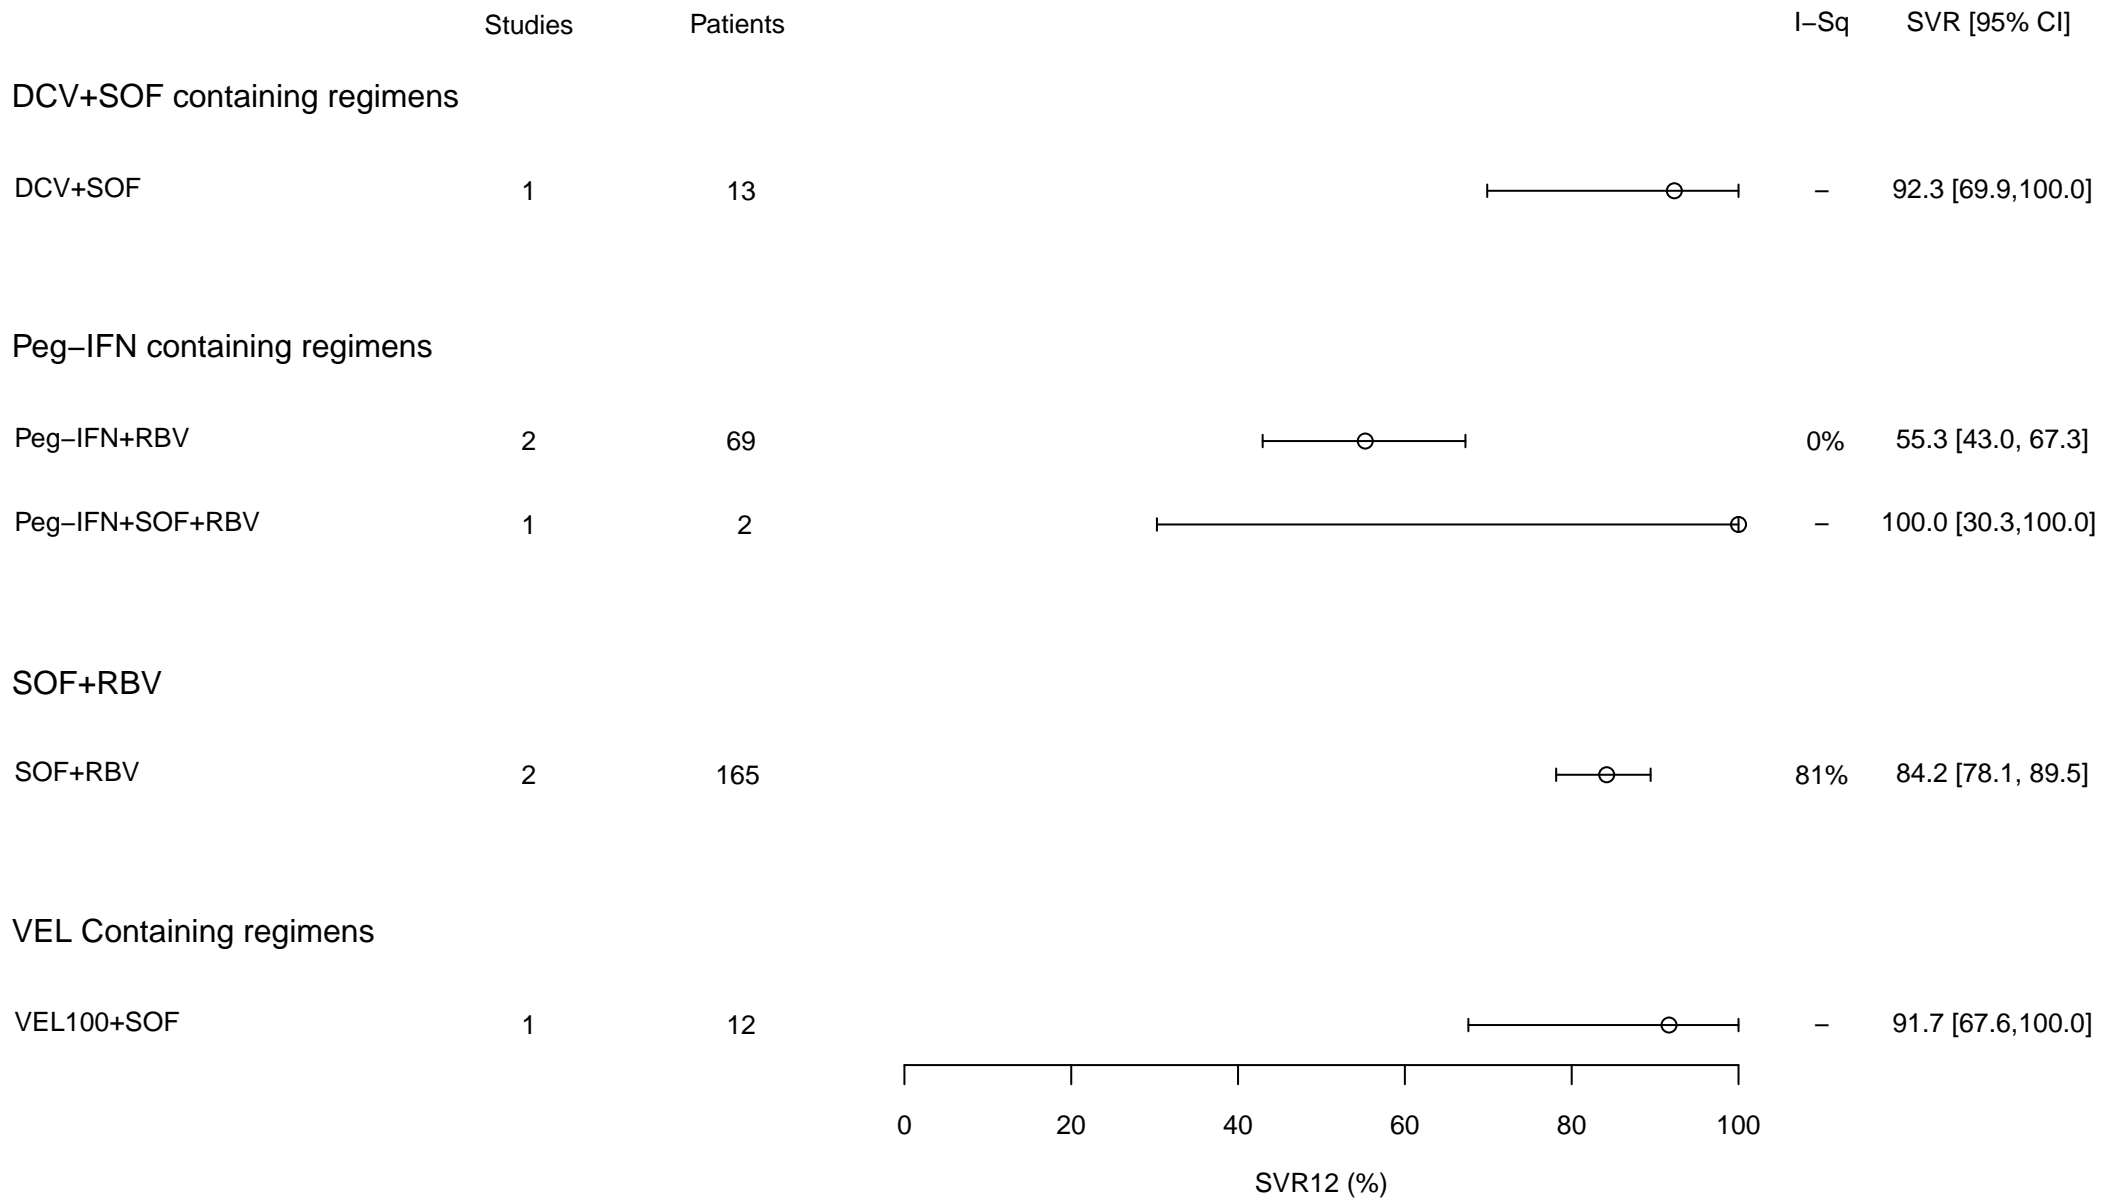

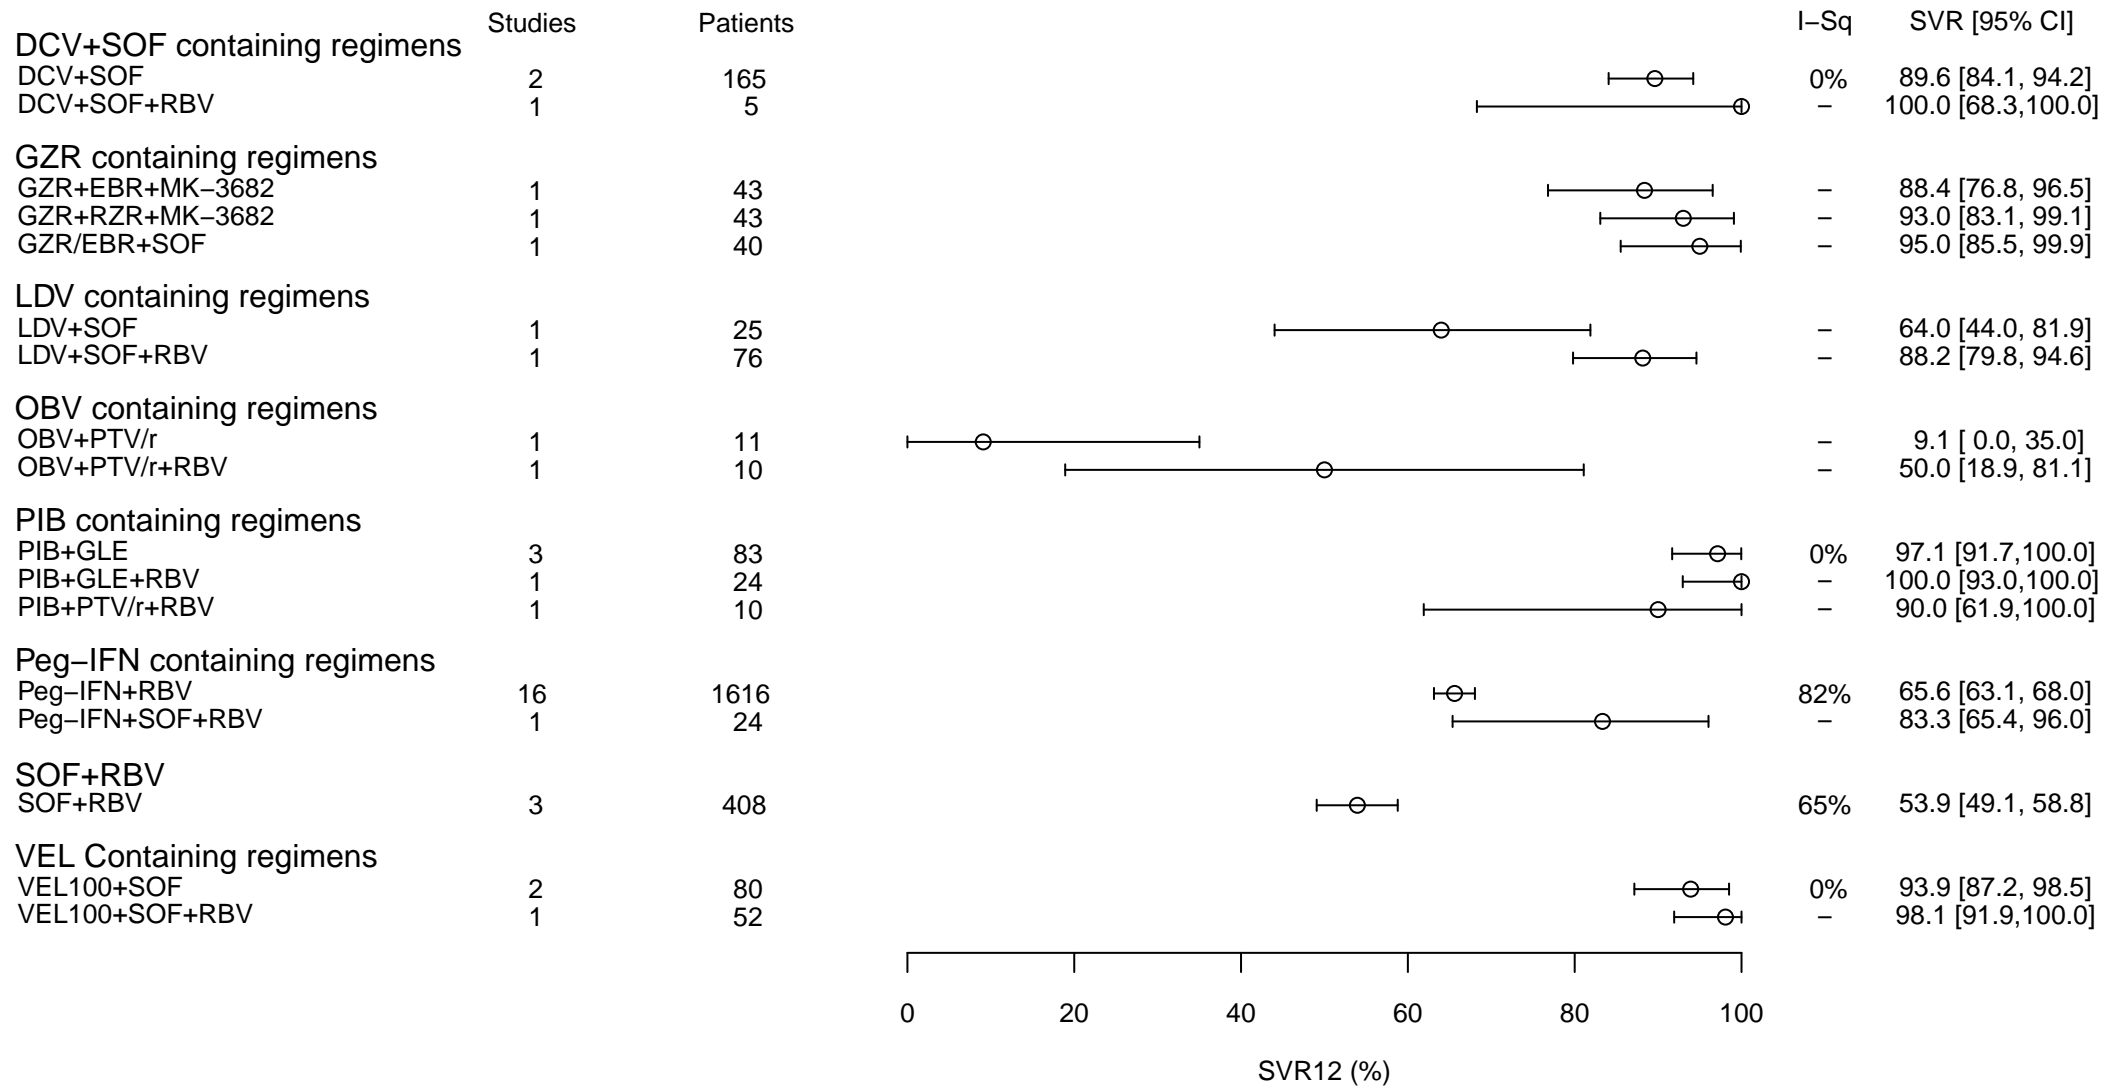

Supplement: 12879_2017_2820_MOESM6_ESM.pdf [file 12879_2017_2820_MOESM6_ESM.pdf]
